# Supplementary material for: Get a Grip: Variation in Human Hand Grip Strength and Implications for Human Evolution
Source: MDPI journal article supplement (doi:10.3390/sym13071142), 2021-06-26
Supplement: s1 [file s1]

## **Supplementary Materials for:**

### **Get a grip: Variation in human hand grip strength and implications for human evolution**

Ameline Bardo<sup>1</sup>, Tracy L. Kivell<sup>1,2</sup>, Katie Town<sup>1</sup>, Georgina Donati<sup>3</sup>, Haiko Ballieux<sup>4</sup>, Cosmin Stamate<sup>5</sup>, Trudi Edginton<sup>6</sup>, Gillian S. Forrester<sup>7</sup>

<sup>1</sup> Skeletal Biology Research Centre, School of Anthropology and Conservation, University of Kent, Canterbury, Kent, CT2 7NR, UK.

<sup>2</sup> Department of Human Evolution, Max Planck Institute for Evolutionary Anthropology, D-04103 Leipzig, Germany.

<sup>3</sup> Department of Psychiatry, University of Oxford, Warneford Hospital, Oxford OX3 7JX, UK.

<sup>4</sup> Psychology, School of Social Sciences, University of Westminster, London W1W 6UW, UK.

<sup>5</sup> Department of Computer Science, Birkbeck, University of London, London WC1E 7HX, UK.

<sup>6</sup> Department of Psychology, City, University of London, London EC1V 0HB, UK.

<sup>7</sup> Department of Psychological Sciences, Birkbeck, University of London, Malet Street, London W1CE 7HX, UK.

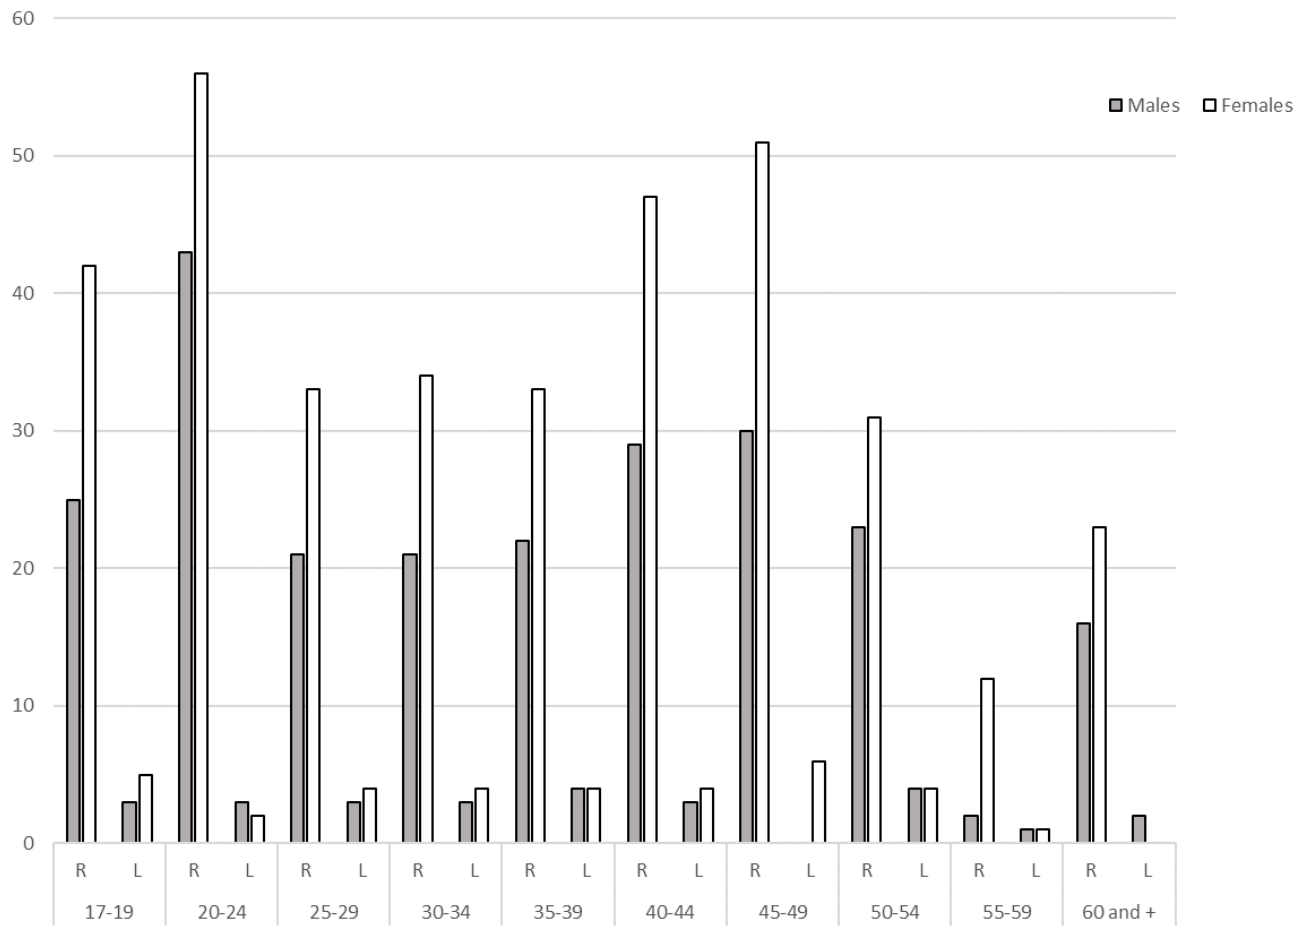

**Fig. S1.** Distribution of participants used in the analyses according to ages groups and with right-handed (R) and left-handed (L) participants.

**A****Hand shape by age**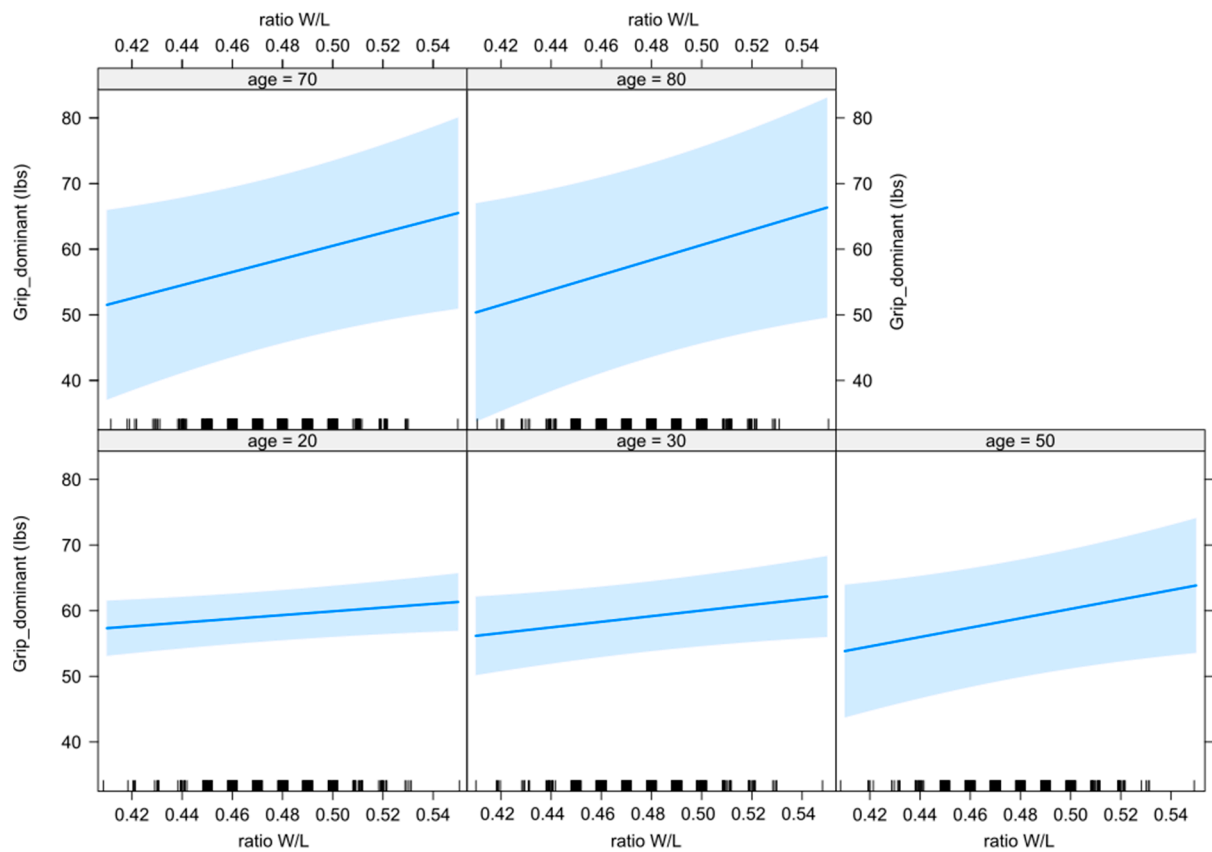**B****Hand shape by age**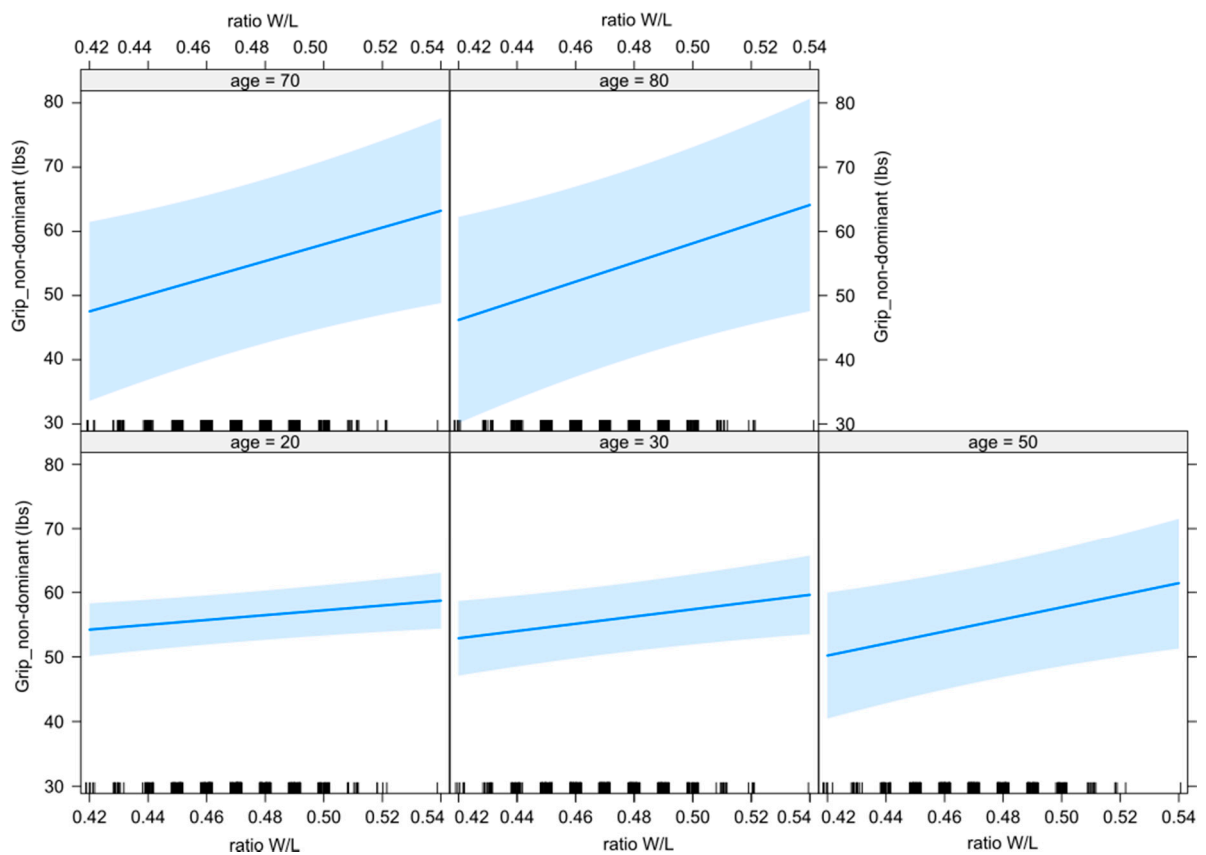

**Fig. S2.** Predictor effect plots for the fitting linear models of the interaction between age and hand shape for grip strength in female, for the dominant hand (A) and the non-dominant hand (B).

**Table S1.** Details of the difference in percentage between hand grip strength in dominant and non-dominant hands for each sex (M = males; F = females) and ages groups, according to right and left-handers, practicing of sport and the different occupations.

|                     | All individuals |            | Right-handed |          | Left-handed |            | Practicing sport |            | No practice of sport |            | Forceful manual labour |            | Office job/work |            | Precision manual work |            |
|---------------------|-----------------|------------|--------------|----------|-------------|------------|------------------|------------|----------------------|------------|------------------------|------------|-----------------|------------|-----------------------|------------|
| Rank of age (years) | M               | F          | M            | F        | M           | F          | M                | F          | M                    | F          | M                      | F          | M               | F          | M                     | F          |
| 17-19 (N = 75)      | 7.7             | 6.7        | 7.3          | 6.6      | 11.5        | 7          | 6.4              | 5.3        | 12.6                 | 10.8       | -                      | -          | 7.7             | 6.7        | -                     | -          |
| 20-24 (N = 104)     | 4.5             | 3.8        | 4.7          | 3.6      | 1           | 10.8       | 3.1              | 3.6        | 11.4                 | 4          | 0.5                    | 0.9        | 5.9             | 4          | -0.5                  | 4          |
| 25-29 (N = 61)      | 5.1             | 6.4        | 4.4          | 5.2      | 9.8         | 16.6       | 4.5              | 4.4        | 8.9                  | 8.1        | 14.7                   | 2.3        | 1.8             | 7.6        | 11.3                  | 5.2        |
| 30-34 (N = 62)      | 8.5             | 4.6        | 8.4          | 4.6      | 8.7         | 4.9        | 9.8              | 0.7        | 2.2                  | 8          | 10                     | 4.8        | 7.8             | 4.3        | 12.2                  | 5.9        |
| 35-39 (N = 63)      | 1.9             | 3.5        | 0.9          | 3.4      | 8.3         | 4          | 1.4              | 1.8        | 3.2                  | 5.2        | -2                     | 5.2        | 2.9             | 2.7        | -                     | 6          |
| 40-44 (N = 82)      | 5               | 0.4        | 4.9          | 0.8      | 6           | -5         | 6.2              | -0.7       | 3                    | 1.3        | -1.6                   | 2.6        | 6               | 0          | 15.6                  | 3.6        |
| 45-49 (N = 87)      | 5.6             | 4.4        | 5.6          | 4.1      | -           | 6.5        | 6.8              | 3.9        | 2.9                  | 4.8        | 0                      | 5.9        | 7.6             | 4.3        | 0.7                   | 3.8        |
| 50-54 (N = 62)      | 4.8             | 2.2        | 4.2          | 1.8      | 9           | 6          | 1.5              | 2.7        | 9.1                  | 1.5        | -4                     | -          | 6.6             | 2.9        | -1.4                  | -10.3      |
| 55-59 (N = 16)      | 11.4            | 4.2        | 9.8          | 3.3      | 14.6        | 15.2       | 11.4             | 7.5        | -                    | -1.4       | -                      | -          | 11.4            | 6.5        | -                     | 17.7       |
| 60 and + (N = 41)   | 7.6             | 8.8        | 7.6          | 8.8      | 7.9         | -          | 9.7              | 11.5       | 6                    | 6.4        | 11.9                   | --         | 8.1             | 7.4        | -2.9                  | -20        |
| <b>Total all</b>    | <b>5.5</b>      | <b>4.2</b> | <b>5.2</b>   | <b>4</b> | <b>8.2</b>  | <b>6.4</b> | <b>5.2</b>       | <b>3.5</b> | <b>6.2</b>           | <b>4.9</b> | <b>2.2</b>             | <b>3.3</b> | <b>6.1</b>      | <b>4.2</b> | <b>4.7</b>            | <b>4.4</b> |
